# Supplementary material for: Five new 3D transition MOFs based on 1-(3,5-dicarboxylatobenzyl)-3,5-pyrazole dicarboxylic acid displaying unique luminescence sensing towards Fe3+ and magnetic properties
Source: Royal Society of Chemistry journal article supplement (doi:10.1039/c9dt00933g), 2019-01-01
Supplement: c9dt00933g1.pdf [file c9dt00933g1.pdf]

*Supporting Information*

**Five new 3D transition MOFs based on 1-(3,5-Dicarboxylato benzyl)-3,5-pyrazole dicarboxylic acid displaying the unique luminescent sensing towards Fe<sup>3+</sup> and magnetic properties**

Wei-Ni Liu,<sup>‡</sup> Wen-Quan Tong,<sup>‡</sup> Lu-Lu Ma, Yao Wang, Jiao-Min Wang, Lei Hou\* and Yao-Yu Wang\*

*Key Laboratory of Synthetic and Natural Functional Molecule Chemistry of the Ministry of Education, Shaanxi Key Laboratory of Physico-Inorganic Chemistry, College of Chemistry and Materials Science, Northwest University, Xi'an, Shaanxi 710127, P. R. China. E-mail: wyaoyu@nwu.edu.cn. lhou2009@nwu.edu.cn.*

**Table S1** Crystal data and structure refinements for **1-5**.

| Complexes                                                      | <b>1</b>                                                                       | <b>2</b>                                                                       | <b>3</b>                                                                       | <b>4</b>                                                                                       | <b>5</b>                                                                       |
|----------------------------------------------------------------|--------------------------------------------------------------------------------|--------------------------------------------------------------------------------|--------------------------------------------------------------------------------|------------------------------------------------------------------------------------------------|--------------------------------------------------------------------------------|
| Formula                                                        | C <sub>28</sub> H <sub>20</sub> Zn <sub>3</sub> N <sub>4</sub> O <sub>19</sub> | C <sub>14</sub> H <sub>16</sub> Ba <sub>2</sub> N <sub>2</sub> O <sub>15</sub> | C <sub>28</sub> H <sub>26</sub> Ba <sub>4</sub> N <sub>4</sub> O <sub>23</sub> | C <sub>28</sub> H <sub>24</sub> Cd <sub>3</sub> Cl <sub>2</sub> N <sub>4</sub> O <sub>20</sub> | C <sub>14</sub> H <sub>10</sub> Cu <sub>2</sub> N <sub>2</sub> O <sub>10</sub> |
| <i>M<sub>r</sub></i>                                           | 912.65                                                                         | 726.97                                                                         | 1335.89                                                                        | 1144.61                                                                                        | 493.34                                                                         |
| Crystal system                                                 | Orthorhombic                                                                   | Monoclinic                                                                     | Monoclinic                                                                     | Monoclinic                                                                                     | Orthorhombic                                                                   |
| Space group                                                    | <i>Fddd</i>                                                                    | <i>P2<sub>1</sub>/n</i>                                                        | <i>P2<sub>1</sub>/n</i>                                                        | <i>P2<sub>1</sub>/n</i>                                                                        | <i>Fddd</i>                                                                    |
| <i>a</i> (Å)                                                   | 19.640(2)                                                                      | 9.3811(8)                                                                      | 12.9214(15)                                                                    | 10.880(9)                                                                                      | 15.339(3)                                                                      |
| <i>b</i> (Å)                                                   | 22.990(3)                                                                      | 18.3474(17)                                                                    | 10.4575(12)                                                                    | 12.209(9)                                                                                      | 30.839(7)                                                                      |
| <i>c</i> (Å)                                                   | 29.085(3)                                                                      | 13.1915(12)                                                                    | 14.1666(16)                                                                    | 14.708(12)                                                                                     | 32.070(7)                                                                      |
| <i>α</i> (°)                                                   | 90                                                                             | 90                                                                             | 90                                                                             | 90                                                                                             | 90                                                                             |
| <i>β</i> (°)                                                   | 90                                                                             | 105.0625(13)                                                                   | 93.894(2)                                                                      | 107.306(11)                                                                                    | 90                                                                             |
| <i>γ</i> (°)                                                   | 90                                                                             | 90                                                                             | 90                                                                             | 90                                                                                             | 90                                                                             |
| <i>V</i> (Å <sup>3</sup> )                                     | 13133(2)                                                                       | 2192.5(3)                                                                      | 1909.8(4)                                                                      | 1865(3)                                                                                        | 15171(6)                                                                       |
| <i>Z</i>                                                       | 16                                                                             | 4                                                                              | 2                                                                              | 2                                                                                              | 32                                                                             |
| <i>D<sub>calc</sub></i> (g cm <sup>-3</sup> )                  | 1.846                                                                          | 2.202                                                                          | 2.323                                                                          | 2.038                                                                                          | 1.728                                                                          |
| <i>F</i> (000)                                                 | 7328                                                                           | 1384                                                                           | 1260                                                                           | 1116                                                                                           | 7872                                                                           |
| <i>R<sub>int</sub></i>                                         | 0.0475                                                                         | 0.0271                                                                         | 0.0224                                                                         | 0.0244                                                                                         | 0.0607                                                                         |
| GOF on <i>F</i> <sup>2</sup>                                   | 1.050                                                                          | 1.018                                                                          | 1.112                                                                          | 1.080                                                                                          | 1.022                                                                          |
| <i>R<sub>I</sub></i> <sup>a</sup> [ <i>I</i> > 2σ( <i>I</i> )] | 0.0540                                                                         | 0.0238                                                                         | 0.0234                                                                         | 0.0293                                                                                         | 0.0431                                                                         |
| w <i>R</i> <sub>2</sub> <sup>b</sup> (all data)                | 0.1523                                                                         | 0.0569                                                                         | 0.0708                                                                         | 0.0756                                                                                         | 0.1119                                                                         |

$$^a R_I = \sum ||F_o| - |F_c|| / \sum |F_o|. ^b wR_2 = [\sum w(F_o^2 - F_c^2)^2 / \sum w(F_o^2)^2]^{1/2}.$$

**Table S2.** Selected bond lengths [Å] and angles [°] for **1-5**.

| <b>1(Zn)</b>                                                                                                                                                           |            |                     |            |
|------------------------------------------------------------------------------------------------------------------------------------------------------------------------|------------|---------------------|------------|
| Zn(1)-O(1W)                                                                                                                                                            | 2.006(5)   | Zn(1)-O(1)          | 2.046(5)   |
| Zn(1)-O(7)#1                                                                                                                                                           | 2.050(4)   | Zn(1)-O(6)#2        | 2.091(4)   |
| Zn(1)-N(2)#1                                                                                                                                                           | 2.240(5)   | Zn(1)-O(2)          | 2.334(5)   |
| Zn(2)-O(5)#3                                                                                                                                                           | 1.923(4)   | Zn(2)-O(5)#4        | 1.923(4)   |
| Zn(2)-O(7)                                                                                                                                                             | 1.966(4)   | Zn(2)-O(7)#5        | 1.966(4)   |
| N(2)-Zn(1)#1                                                                                                                                                           | 2.240(5)   | O(5)-Zn(2)#6        | 1.923(4)   |
| O(6)-Zn(1)#2                                                                                                                                                           | 2.091(4)   | O(7)-Zn(1)#1        | 2.050(4)   |
| O(1W)-Zn(1)-O(1)                                                                                                                                                       | 151.21(19) | O(1W)-Zn(1)-O(7)#1  | 104.90(19) |
| O(1)-Zn(1)-O(7)#1                                                                                                                                                      | 103.70(18) | O(1W)-Zn(1)-O(6)#2  | 87.8(2)    |
| O(1)-Zn(1)-O(6)#2                                                                                                                                                      | 89.1(2)    | O(7)#1-Zn(1)-O(6)#2 | 89.73(18)  |
| O(1W)-Zn(1)-N(2)#1                                                                                                                                                     | 97.87(19)  | O(1)-Zn(1)-N(2)#1   | 92.19(18)  |
| O(7)#1-Zn(1)-N(2)#1                                                                                                                                                    | 75.96(15)  | O(6)#2-Zn(1)-N(2)#1 | 165.53(19) |
| O(1W)-Zn(1)-O(2)                                                                                                                                                       | 93.48(18)  | O(1)-Zn(1)-O(2)     | 58.63(18)  |
| O(7)#1-Zn(1)-O(2)                                                                                                                                                      | 160.48(17) | O(6)#2-Zn(1)-O(2)   | 97.66(19)  |
| N(2)#1-Zn(1)-O(2)                                                                                                                                                      | 95.30(17)  | O(5)#3-Zn(2)-O(5)#4 | 122.5(3)   |
| O(5)#3-Zn(2)-O(7)                                                                                                                                                      | 106.83(17) | O(5)#4-Zn(2)-O(7)   | 102.17(19) |
| O(5)#3-Zn(2)-O(7)#5                                                                                                                                                    | 102.17(19) | O(5)#4-Zn(2)-O(7)#5 | 106.83(17) |
| O(5)#4-Zn(2)-O(7)#5                                                                                                                                                    | 106.83(17) | O(7)-Zn(2)-O(7)#5   | 117.3(3)   |
| Symmetrical codes: #1: -x+1/4, y, -z+1/4; #2: -x+1/2, -y+2, -z+1/2; #3: x-1/4, -y+2, z-1/4; #4: x-1/4, y+1/4, -z+1/2; #5: x, -y+9/4, -z+1/4; #6: x+1/4, y-1/4, -z+1/2. |            |                     |            |
| <b>2(Ba)</b>                                                                                                                                                           |            |                     |            |
| Ba(1)-O(1)                                                                                                                                                             | 2.913(2)   | Ba(1)-O(1W)         | 2.868(3)   |
| Ba(1)-O(2)                                                                                                                                                             | 2.746(2)   | Ba(1)-O(2W)         | 2.913(2)   |
| Ba(1)-O(5)#1                                                                                                                                                           | 2.687(7)   | Ba(1)-O(5A)#1       | 2.871(7)   |
| Ba(1)-O(6)#1                                                                                                                                                           | 3.187(2)   | Ba(1)-O(6)#2        | 2.676(2)   |
| Ba(1)-O(6W)                                                                                                                                                            | 2.785(2)   | Ba(1)-O(7)#3        | 2.787(2)   |
| Ba(2)-O(1)#4                                                                                                                                                           | 2.7589(19) | Ba(2)-O(2W)         | 2.984(2)   |
| Ba(2)-O(3)#5                                                                                                                                                           | 2.793(2)   | Ba(2)-O(3W)         | 2.852(3)   |
| Ba(2)-O(4WA)                                                                                                                                                           | 2.949(12)  | Ba(2)-O(4WB)        | 2.663(12)  |
| Ba(2)-O(5)#1                                                                                                                                                           | 2.689(7)   | Ba(2)-O(5A)#1       | 2.698(7)   |
| Ba(2)-O(8)#6                                                                                                                                                           | 2.727(2)   | Ba(2)-N(2)#1        | 3.068(2)   |
| O(1)-Ba(2)#7                                                                                                                                                           | 2.7588(18) | O(3)-Ba(2)#8        | 2.7932(19) |
| O(5)-Ba(1)#1                                                                                                                                                           | 2.687(7)   | O(5)-Ba(2)#1        | 2.689(7)   |
| O(5A)-Ba(1)#1                                                                                                                                                          | 2.871(7)   | O(5A)-Ba(2)#1       | 2.698(7)   |
| O(6)-Ba(1)#1                                                                                                                                                           | 3.187(2)   | O(6)-Ba(1)#9        | 2.676(2)   |
| O(7)-Ba(1)#10                                                                                                                                                          | 2.787(2)   | O(8)-Ba(2)#11       | 2.727(2)   |
| N(2)-Ba(2)#1                                                                                                                                                           | 3.068(2)   | O(1)-Ba(1)-O(2W)    | 80.05(6)   |
| O(1)-Ba(1)-O(6)#1                                                                                                                                                      | 123.12(6)  | O(1W)-Ba(1)-O(1)    | 77.44(7)   |
| O(1W)-Ba(1)-O(2W)                                                                                                                                                      | 122.66(8)  | O(1W)-Ba(1)-O(5A)#1 | 160.39(14) |
| O(1W)-Ba(1)-O(6)#1                                                                                                                                                     | 139.03(8)  | O(2)-Ba(1)-O(1)     | 45.99(5)   |
| O(2)-Ba(1)-O(1W)                                                                                                                                                       | 120.79(7)  | O(2)-Ba(1)-O(2W)    | 70.38(7)   |

|                                                                                                                                                                                                                                                |            |                      |            |
|------------------------------------------------------------------------------------------------------------------------------------------------------------------------------------------------------------------------------------------------|------------|----------------------|------------|
| O(2)-Ba(1)-O(5A)#1                                                                                                                                                                                                                             | 78.30(14)  | O(2)-Ba(1)-O(6)#1    | 79.20(6)   |
| O(2)-Ba(1)-O(6W)                                                                                                                                                                                                                               | 136.95(7)  | O(2)-Ba(1)-O(7)#3    | 119.80(7)  |
| O(2W)-Ba(1)-O(6)#1                                                                                                                                                                                                                             | 97.07(6)   | O(5)#1-Ba(1)-O(1)    | 133.82(16) |
| O(5)#1-Ba(1)-O(1W)                                                                                                                                                                                                                             | 146.21(17) | O(5)#1-Ba(1)-O(2)    | 92.94(16)  |
| O(5)#1-Ba(1)-O(2W)                                                                                                                                                                                                                             | 63.95(16)  | O(5)#1-Ba(1)-O(6)#1  | 42.70(17)  |
| O(5)#1-Ba(1)-O(6W)                                                                                                                                                                                                                             | 81.55(16)  | O(5)#1-Ba(1)-O(7)#3  | 96.08(17)  |
| O(5A)#1-Ba(1)-O(1)                                                                                                                                                                                                                             | 119.23(13) | O(5A)#1-Ba(1)-O(2W)  | 56.32(14)  |
| O(5A)#1-Ba(1)-O(6)#1                                                                                                                                                                                                                           | 42.57(14)  | O(6)#2-Ba(1)-O(1)    | 75.99(6)   |
| O(6)#2-Ba(1)-O(1W)                                                                                                                                                                                                                             | 80.82(8)   | O(6)#2-Ba(1)-O(2)    | 71.25(7)   |
| O(6)#2-Ba(1)-O(2W)                                                                                                                                                                                                                             | 141.47(7)  | O(6)#2-Ba(1)-O(5)#1  | 115.03(17) |
| O(6)#2-Ba(1)-O(5A)#1                                                                                                                                                                                                                           | 111.97(15) | O(6)#2-Ba(1)-O(6)#1  | 72.34(7)   |
| O(6)#2-Ba(1)-O(6W)                                                                                                                                                                                                                             | 72.76(8)   | O(6)#2-Ba(1)-O(7)#3  | 147.08(7)  |
| O(6W)-Ba(1)-O(1)                                                                                                                                                                                                                               | 140.91(8)  | O(6W)-Ba(1)-O(1W)    | 74.94(8)   |
| O(6W)-Ba(1)-O(2W)                                                                                                                                                                                                                              | 138.61(8)  | O(6W)-Ba(1)-O(5A)#1  | 94.20(14)  |
| O(6W)-Ba(1)-O(6)#1                                                                                                                                                                                                                             | 67.93(7)   | O(6W)-Ba(1)-O(7)#3   | 103.25(8)  |
| O(7)#3-Ba(1)-O(1)                                                                                                                                                                                                                              | 90.50(6)   | O(7)#3-Ba(1)-O(1W)   | 66.86(8)   |
| O(7)#3-Ba(1)-O(2W)                                                                                                                                                                                                                             | 61.35(7)   | O(7)#3-Ba(1)-O(5A)#1 | 100.85(15) |
| O(7)#3-Ba(1)-O(6)#1                                                                                                                                                                                                                            | 137.72(6)  | O(1)#4-Ba(2)-O(2W)   | 89.00(6)   |
| O(1)#4-Ba(2)-O(3)#5                                                                                                                                                                                                                            | 83.45(6)   | O(1)#4-Ba(2)-O(3W)   | 81.23(9)   |
| O(1)#4-Ba(2)-O(4WA)                                                                                                                                                                                                                            | 68.7(2)    | O(1)#4-Ba(2)-N(2)#1  | 158.78(6)  |
| O(2W)-Ba(2)-N(2)#1                                                                                                                                                                                                                             | 112.08(6)  | O(3)#5-Ba(2)-O(2W)   | 143.71(6)  |
| O(3)#5-Ba(2)-O(3W)                                                                                                                                                                                                                             | 138.86(9)  | O(3)#5-Ba(2)-O(4WA)  | 65.6(2)    |
| O(3)#5-Ba(2)-N(2)#1                                                                                                                                                                                                                            | 80.72(6)   | O(3W)-Ba(2)-O(2W)    | 73.91(8)   |
| O(3W)-Ba(2)-O(4WA)                                                                                                                                                                                                                             | 139.3(2)   | O(3W)-Ba(2)-N(2)#1   | 101.70(8)  |
| O(4WA)-Ba(2)-O(2W)                                                                                                                                                                                                                             | 78.6(2)    | O(4WA)-Ba(2)-N(2)#1  | 116.4(2)   |
| O(4WB)-Ba(2)-O(1)#4                                                                                                                                                                                                                            | 79.2(3)    | O(4WB)-Ba(2)-O(2W)   | 71.8(2)    |
| O(4WB)-Ba(2)-O(3)#5                                                                                                                                                                                                                            | 71.9(2)    | O(4WB)-Ba(2)-O(3W)   | 140.5(3)   |
| O(4WB)-Ba(2)-O(5A)#1                                                                                                                                                                                                                           | 99.9(3)    | O(4WB)-Ba(2)-O(8)#6  | 144.3(2)   |
| O(4WB)-Ba(2)-N(2)#1                                                                                                                                                                                                                            | 108.8(3)   | O(5)#1-Ba(2)-O(1)#4  | 138.81(16) |
| O(5)#1-Ba(2)-O(2W)                                                                                                                                                                                                                             | 62.94(16)  | O(5)#1-Ba(2)-O(3)#5  | 137.04(16) |
| O(5)#1-Ba(2)-O(3W)                                                                                                                                                                                                                             | 63.02(18)  | O(5)#1-Ba(2)-O(4WA)  | 127.3(2)   |
| O(5)#1-Ba(2)-O(8)#6                                                                                                                                                                                                                            | 95.12(16)  | O(5)#1-Ba(2)-N(2)#1  | 56.52(16)  |
| O(5A)#1-Ba(2)-O(1)#4                                                                                                                                                                                                                           | 143.60(15) | O(5A)#1-Ba(2)-O(2W)  | 57.17(14)  |
| O(5A)#1-Ba(2)-O(3)#5                                                                                                                                                                                                                           | 131.37(15) | O(5A)#1-Ba(2)-O(3W)  | 76.90(17)  |
| O(5A)#1-Ba(2)-O(8)#6                                                                                                                                                                                                                           | 108.34(14) | O(5A)#1-Ba(2)-N(2)#1 | 56.05(15)  |
| O(8)#6-Ba(2)-O(1)#4                                                                                                                                                                                                                            | 90.14(6)   | O(8)#6-Ba(2)-O(2W)   | 142.65(6)  |
| O(8)#6-Ba(2)-O(3)#5                                                                                                                                                                                                                            | 73.04(7)   | O(8)#6-Ba(2)-O(3W)   | 69.07(8)   |
| O(8)#6-Ba(2)-O(4WA)                                                                                                                                                                                                                            | 134.9(2)   | O(8)#6-Ba(2)-N(2)#1  | 71.78(6)   |
| Symmetrical codes: #1: -x+1, -y, -z+2; #2: x-1, y, z; #3: x-1/2, -y+1/2, z+1/2; #4: x+1/2, -y+1/2, z+1/2; #5: x+1, y, z+1; #6: x, y, z+1; #7: x-1/2, -y+1/2, z-1/2; #8: x-1, y, z-1; #9: x+1, y, z; #10: x+1/2, -y+1/2, z-1/2; #11: x, y, z-1. |            |                      |            |
| <b>3(Ba)</b>                                                                                                                                                                                                                                   |            |                      |            |
| Ba(3)-O(8)#1                                                                                                                                                                                                                                   | 2.726(3)   | Ba(3)-O(8)           | 2.726(3)   |

|                      |            |                      |            |
|----------------------|------------|----------------------|------------|
| Ba(3)-O(4)#2         | 2.751(3)   | Ba(3)-O(4)#3         | 2.751(3)   |
| Ba(3)-O(2)#4         | 2.831(3)   | Ba(3)-O(2)#5         | 2.831(3)   |
| Ba(3)-O(11)          | 2.753(4)   | Ba(3)-O(11)#1        | 2.753(4)   |
| Ba(2)-O(8)#1         | 2.845(3)   | Ba(2)-O(1)#5         | 2.868(3)   |
| Ba(2)-O(4)#2         | 2.882(3)   | Ba(2)-O(7)#1         | 2.932(3)   |
| Ba(2)-O(2)#5         | 3.106(3)   | Ba(2)-O(6)#6         | 3.190(3)   |
| Ba(2)-O(6)           | 2.720(3)   | Ba(2)-O(3)#2         | 2.839(3)   |
| Ba(2)-O(5)#6         | 2.745(3)   | Ba(2)-O(12)#7        | 2.900(5)   |
| Ba(2)-O(10)          | 3.014(5)   | Ba(1)-O(1)#8         | 2.772(3)   |
| Ba(1)-O(1)#9         | 2.772(3)   | Ba(1)-O(7)#10        | 2.835(3)   |
| Ba(1)-O(7)#2         | 2.835(3)   | Ba(1)-O(5)           | 2.592(3)   |
| Ba(1)-O(5)#11        | 2.592(3)   | Ba(1)-O(9)           | 2.729(7)   |
| O(8)-Ba(3)-O(8)#1    | 83.00(12)  | O(8)-Ba(3)-O(4)#3    | 72.34(8)   |
| O(8)#1-Ba(3)-O(4)#2  | 72.34(8)   | O(8)-Ba(3)-O(4)#2    | 85.83(8)   |
| O(8)#1-Ba(3)-O(4)#3  | 85.83(8)   | O(8)-Ba(3)-O(2)#4    | 65.95(9)   |
| O(8)#1-Ba(3)-O(2)#5  | 65.95(9)   | O(8)-Ba(3)-O(2)#5    | 147.18(8)  |
| O(8)#1-Ba(3)-O(2)#4  | 147.18(9)  | O(8)#1-Ba(3)-O(11)   | 119.60(11) |
| O(8)-Ba(3)-O(11)     | 136.70(11) | O(8)-Ba(3)-O(11)#1   | 119.60(11) |
| O(8)#1-Ba(3)-O(11)#1 | 136.70(11) | O(4)#2-Ba(3)-O(4)#3  | 150.92(12) |
| O(4)#3-Ba(3)-O(2)#4  | 75.18(9)   | O(4)#3-Ba(3)-O(2)#5  | 113.63(9)  |
| O(4)#2-Ba(3)-O(2)#4  | 113.63(9)  | O(4)#2-Ba(3)-O(2)#5  | 75.18(9)   |
| O(4)#2-Ba(3)-O(11)   | 134.32(12) | O(4)#3-Ba(3)-O(11)#1 | 134.32(12) |
| O(4)#3-Ba(3)-O(11)   | 73.19(13)  | O(4)#2-Ba(3)-O(11)#1 | 73.19(13)  |
| O(2)#5-Ba(3)-O(2)#4  | 146.41(12) | O(11)#1-Ba(3)-O(2)#4 | 72.14(11)  |
| O(11)#1-Ba(3)-O(2)#5 | 80.52(11)  | O(11)-Ba(3)-O(2)#4   | 80.52(11)  |
| O(11)-Ba(3)-O(2)#5   | 72.13(11)  | O(11)-Ba(3)-O(11)#1  | 70.7(2)    |
| O(8)#1-Ba(2)-O(1)#5  | 74.44(9)   | O(8)#1-Ba(2)-O(4)#2  | 68.74(8)   |
| O(8)#1-Ba(2)-O(7)#1  | 45.13(8)   | O(8)#1-Ba(2)-O(2)#5  | 60.93(9)   |
| O(8)#1-Ba(2)-O(6)#6  | 129.96(8)  | O(8)#1-Ba(2)-O(12)#7 | 151.45(15) |
| O(8)#1-Ba(2)-O(10)   | 140.27(14) | O(1)#5-Ba(2)-O(4)#2  | 112.60(8)  |
| O(1)#5-Ba(2)-O(7)#1  | 64.16(9)   | O(1)#5-Ba(2)-O(2)#5  | 43.57(8)   |
| O(1)#5-Ba(2)-O(6)#6  | 110.18(8)  | O(1)#5-Ba(2)-O(10)   | 143.55(14) |
| O(1)#5-Ba(2)-O(12)#7 | 80.00(15)  | O(4)#2-Ba(2)-O(6)#6  | 136.84(8)  |
| O(4)#2-Ba(2)-O(7)#1  | 113.07(8)  | O(4)#2-Ba(2)-O(2)#5  | 69.21(8)   |
| O(4)#2-Ba(2)-O(12)#7 | 111.03(12) | O(4)#2-Ba(2)-O(10)   | 81.32(13)  |
| O(7)#1-Ba(2)-O(2)#5  | 84.76(9)   | O(7)#1-Ba(2)-O(6)#6  | 90.37(9)   |
| O(7)#1-Ba(2)-O(10)   | 143.31(12) | O(2)#5-Ba(2)-O(6)#6  | 152.13(7)  |
| O(6)-Ba(2)-O(8)#1    | 74.12(9)   | O(6)-Ba(2)-O(1)#5    | 138.04(10) |
| O(6)-Ba(2)-O(4)#2    | 80.43(9)   | O(6)-Ba(2)-O(7)#1    | 73.99(10)  |
| O(6)-Ba(2)-O(2)#5    | 132.16(9)  | O(6)-Ba(2)-O(6)#6    | 71.68(9)   |
| O(6)-Ba(2)-O(3)#2    | 111.66(10) | O(6)-Ba(2)-O(5)#6    | 99.84(10)  |
| O(6)-Ba(2)-O(12)#7   | 134.42(15) | O(6)-Ba(2)-O(10)     | 75.69(13)  |
| O(3)#2-Ba(2)-O(8)#1  | 108.43(10) | O(3)#2-Ba(2)-O(1)#5  | 104.19(10) |

|                                                                                                                                                                                                                                                                                                                                                          |            |                      |            |
|----------------------------------------------------------------------------------------------------------------------------------------------------------------------------------------------------------------------------------------------------------------------------------------------------------------------------------------------------------|------------|----------------------|------------|
| O(3)#2-Ba(2)-O(4)#2                                                                                                                                                                                                                                                                                                                                      | 45.32(9)   | O(3)#2-Ba(2)-O(7)#1  | 151.99(10) |
| O(3)#2-Ba(2)-O(2)#5                                                                                                                                                                                                                                                                                                                                      | 71.21(11)  | O(3)#2-Ba(2)-O(6)#6  | 117.59(11) |
| O(3)#2-Ba(2)-O(12)#7                                                                                                                                                                                                                                                                                                                                     | 65.72(12)  | O(3)#2-Ba(2)-O(10)   | 60.76(13)  |
| O(5)#6-Ba(2)-O(8)#1                                                                                                                                                                                                                                                                                                                                      | 112.20(9)  | O(5)#6-Ba(2)-O(1)#5  | 67.81(9)   |
| O(5)#6-Ba(2)-O(4)#2                                                                                                                                                                                                                                                                                                                                      | 179.05(9)  | O(5)#6-Ba(2)-O(7)#1  | 67.87(9)   |
| O(5)#6-Ba(2)-O(2)#5                                                                                                                                                                                                                                                                                                                                      | 111.13(8)  | O(5)#6-Ba(2)-O(6)#6  | 42.64(8)   |
| O(5)#6-Ba(2)-O(3)#2                                                                                                                                                                                                                                                                                                                                      | 133.84(10) | O(5)#6-Ba(2)-O(12)#7 | 68.13(13)  |
| O(5)#6-Ba(2)-O(10)                                                                                                                                                                                                                                                                                                                                       | 97.86(13)  | O(12)#7-Ba(2)-O(7)#1 | 130.96(12) |
| O(12)#7-Ba(2)-O(2)#5                                                                                                                                                                                                                                                                                                                                     | 91.67(14)  | O(12)#7-Ba(2)-O(6)#6 | 71.03(13)  |
| O(12)#7-Ba(2)-O(10)                                                                                                                                                                                                                                                                                                                                      | 63.58(17)  | O(10)-Ba(2)-O(2)#5   | 131.49(12) |
| O(10)-Ba(2)-O(6)#6                                                                                                                                                                                                                                                                                                                                       | 60.53(12)  | O(1)#8-Ba(1)-O(1)#9  | 86.03(12)  |
| O(1)#8-Ba(1)-O(7)#10                                                                                                                                                                                                                                                                                                                                     | 148.90(9)  | O(1)#8-Ba(1)-O(7)#2  | 66.65(9)   |
| O(1)#9-Ba(1)-O(7)#10                                                                                                                                                                                                                                                                                                                                     | 66.65(9)   | O(1)#9-Ba(1)-O(7)#2  | 148.90(9)  |
| O(7)#10-Ba(1)-O(7)#2                                                                                                                                                                                                                                                                                                                                     | 143.33(12) | O(5)-Ba(1)-O(1)#9    | 71.37(10)  |
| O(5)#11-Ba(1)-O(1)#8                                                                                                                                                                                                                                                                                                                                     | 71.37(10)  | O(5)-Ba(1)-O(1)#8    | 114.97(10) |
| O(5)#11-Ba(1)-O(1)#9                                                                                                                                                                                                                                                                                                                                     | 114.97(10) | O(5)#11-Ba(1)-O(7)#2 | 71.39(9)   |
| O(5)#11-Ba(1)-O(7)#10                                                                                                                                                                                                                                                                                                                                    | 105.96(9)  | O(5)-Ba(1)-O(7)#10   | 71.39(9)   |
| O(5)-Ba(1)-O(7)#2                                                                                                                                                                                                                                                                                                                                        | 105.96(9)  | O(5)-Ba(1)-O(5)#11   | 171.95(16) |
| O(5)#11-Ba(1)-O(9)                                                                                                                                                                                                                                                                                                                                       | 85.98(8)   | O(5)-Ba(1)-O(9)      | 85.97(8)   |
| O(9)-Ba(1)-O(1)#9                                                                                                                                                                                                                                                                                                                                        | 136.98(6)  | O(9)-Ba(1)-O(1)#8    | 136.98(6)  |
| O(9)-Ba(1)-O(7)#10                                                                                                                                                                                                                                                                                                                                       | 71.67(6)   | O(9)-Ba(1)-O(7)#2    | 71.67(6)   |
| Symmetrical codes: #1: -x+1/2, y, -z+1/2; #2: -x+1, -y+1, -z+1; #3: x-1/2, -y+1, z-1/2; #4: x, y-1, z; #5: -x+1/2, y-1, -z+1/2; #6: -x, -y+1, -z+1; #7: x-1, y-1, z; #8: -x+1, -y+2, -z+1; #9: x-1/2, -y+2, z+1/2; #10: x-1/2, -y+1, z+1/2; #11: -x+1/2, y, -z+3/2; #12: x+1/2, -y+1, z+1/2; #13: -x+1/2, y+1, -z+1/2; #14: x, y+1, z; #15: x+1, y+1, z. |            |                      |            |
| <b>4(Cd)</b>                                                                                                                                                                                                                                                                                                                                             |            |                      |            |
| Cd(1)-O(1)#1                                                                                                                                                                                                                                                                                                                                             | 2.309(2)   | Cd(1)-O(1)           | 2.420(2)   |
| Cd(1)-O(3)#2                                                                                                                                                                                                                                                                                                                                             | 2.280(2)   | Cd(1)-O(7)#3         | 2.369(2)   |
| Cd(1)-N(1)                                                                                                                                                                                                                                                                                                                                               | 2.428(3)   | Cd(2)-O(4)#2         | 2.326(2)   |
| Cd(2)-O(4)#5                                                                                                                                                                                                                                                                                                                                             | 2.326(2)   | Cd(2)-O(9)#4         | 2.335(3)   |
| Cd(2)-O(9)                                                                                                                                                                                                                                                                                                                                               | 2.335(3)   | O(1)#1-Cd(1)-O(1)    | 73.60(8)   |
| O(1)#1-Cd(1)-O(7)#3                                                                                                                                                                                                                                                                                                                                      | 90.76(10)  | O(1)-Cd(1)-N(1)      | 69.36(7)   |
| O(1)#1-Cd(1)-N(1)                                                                                                                                                                                                                                                                                                                                        | 142.65(7)  | O(3)#2-Cd(1)-O(1)    | 79.65(8)   |
| O(3)#2-Cd(1)-O(1)#1                                                                                                                                                                                                                                                                                                                                      | 90.16(10)  | O(3)#2-Cd(1)-O(7)#3  | 170.34(8)  |
| O(3)#2-Cd(1)-N(1)                                                                                                                                                                                                                                                                                                                                        | 87.86(9)   | O(7)#3-Cd(1)-O(1)    | 91.39(9)   |
| O(7)#3-Cd(1)-N(1)                                                                                                                                                                                                                                                                                                                                        | 85.58(9)   | O(4)#5-Cd(2)-O(4)#2  | 180.00(10) |
| O(4)#5-Cd(2)-O(9)#4                                                                                                                                                                                                                                                                                                                                      | 89.23(11)  | O(4)#2-Cd(2)-O(9)    | 89.23(11)  |
| O(4)#2-Cd(2)-O(9)#4                                                                                                                                                                                                                                                                                                                                      | 90.77(11)  | O(4)#5-Cd(2)-O(9)    | 90.77(11)  |
| Symmetrical codes: #1: -x+1, -y+1, -z; #2: -x+3/2, y+1/2, -z+1/2; #3: -x+1, -y, -z; #4: -x+2, -y+1, -z; #5: x+1/2, -y+1/2, z-1/2; #6: -x+3/2, y-1/2, -z+1/2.                                                                                                                                                                                             |            |                      |            |
| <b>5(Cu)</b>                                                                                                                                                                                                                                                                                                                                             |            |                      |            |
| Cu(1)-O(2)#1                                                                                                                                                                                                                                                                                                                                             | 1.942(3)   | Cu(1)-O(1)           | 1.955(3)   |
| Cu(1)-O(7)#2                                                                                                                                                                                                                                                                                                                                             | 1.964(3)   | Cu(1)-O(8)#3         | 1.969(3)   |

|                                                                                                                                                |            |                     |            |
|------------------------------------------------------------------------------------------------------------------------------------------------|------------|---------------------|------------|
| Cu(1)-O(10)                                                                                                                                    | 2.112(3)   | Cu(2)-O(4)          | 1.895(3)   |
| Cu(2)-O(5)#4                                                                                                                                   | 1.937(3)   | Cu(2)-O(9)          | 1.948(3)   |
| Cu(2)-N(2)#4                                                                                                                                   | 2.029(3)   | O(5)-Cu(2)#4        | 1.937(3)   |
| O(2)-Cu(1)#1                                                                                                                                   | 1.942(3)   | O(8)-Cu(1)#5        | 1.969(3)   |
| N(2)-Cu(2)#4                                                                                                                                   | 2.029(3)   | O(7)-Cu(1)#2        | 1.964(3)   |
| O(2)#1-Cu(1)-O(1)                                                                                                                              | 167.74(13) | O(2)#1-Cu(1)-O(7)#2 | 89.31(17)  |
| O(1)-Cu(1)-O(7)#2                                                                                                                              | 89.31(18)  | O(2)#1-Cu(1)-O(8)#3 | 89.42(16)  |
| O(1)-Cu(1)-O(8)#3                                                                                                                              | 89.38(16)  | O(7)#2-Cu(1)-O(8)#3 | 167.95(12) |
| O(2)#1-Cu(1)-O(10)                                                                                                                             | 100.29(14) | O(1)-Cu(1)-O(10)    | 91.96(14)  |
| O(7)#2-Cu(1)-O(10)                                                                                                                             | 98.81(13)  | O(8)#3-Cu(1)-O(10)  | 93.20(13)  |
| O(4)-Cu(2)-O(5)#4                                                                                                                              | 176.24(12) | O(4)-Cu(2)-O(9)     | 94.48(11)  |
| O(5)#4-Cu(2)-O(9)                                                                                                                              | 84.61(11)  | O(4)-Cu(2)-N(2)#4   | 98.25(12)  |
| O(5)#4-Cu(2)-N(2)#4                                                                                                                            | 81.92(12)  | O(9)-Cu(2)-N(2)#4   | 162.65(12) |
| Symmetrical codes: #1: -x+1, -y+3/2, -z+1/2; #2: -x+5/4, -y+5/4, z; #3: x-1/4, y+1/4, -z+1/2; #4: -x+3/4, y, -z+3/4; #5: x+1/4, y-1/4, -z+1/2. |            |                     |            |

**Table S3** Standard Deviation ( $\delta$ ) calculation for the detection of Fe<sup>3+</sup> for **1**(Zn).

| Test                            | Fluorescence intensity (nm) |
|---------------------------------|-----------------------------|
| 1                               | 5506.319                    |
| 2                               | 5507.293                    |
| 3                               | 5507.033                    |
| 4                               | 5506.435                    |
| 5                               | 5506.632                    |
| 6                               | 5507.155                    |
| 7                               | 5506.914                    |
| 8                               | 5507.332                    |
| 9                               | 5507.139                    |
| 10                              | 5507.265                    |
| average                         | 5506.952                    |
| Standard deviation ( $\delta$ ) | 0.367                       |

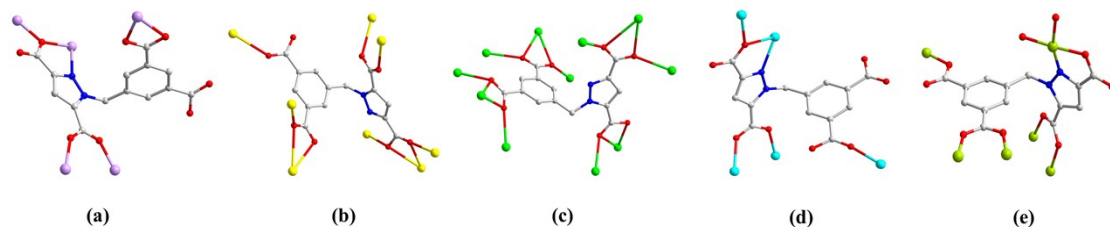

**Fig. S1** Coordination modes of H<sub>4</sub>L in **1-5**.

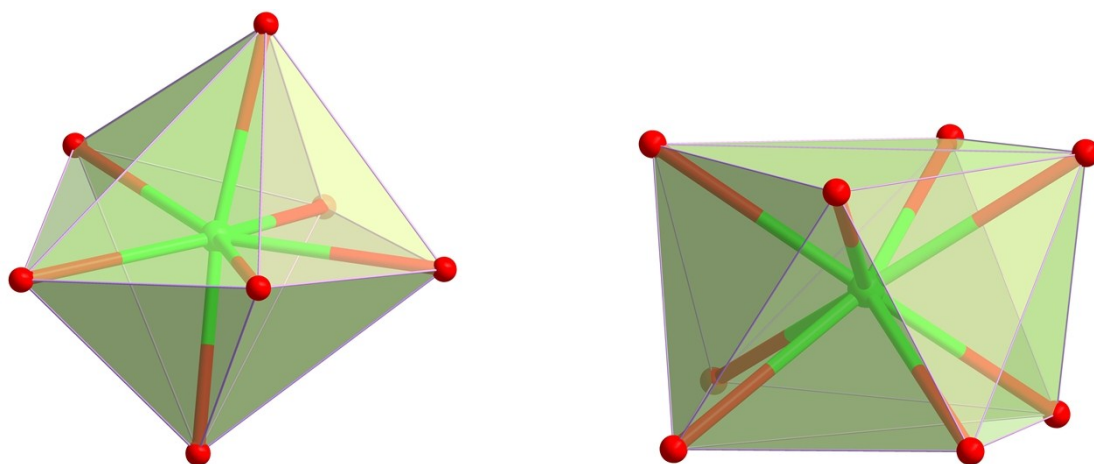

**Fig. S2** Coordination arrangement of  $Ba^{2+1}$  (a) and  $Ba^{2+3}$  (b) ions could be described as a distorted pentagonal bipyramid and distorted prismaid coordination geometry respectively.

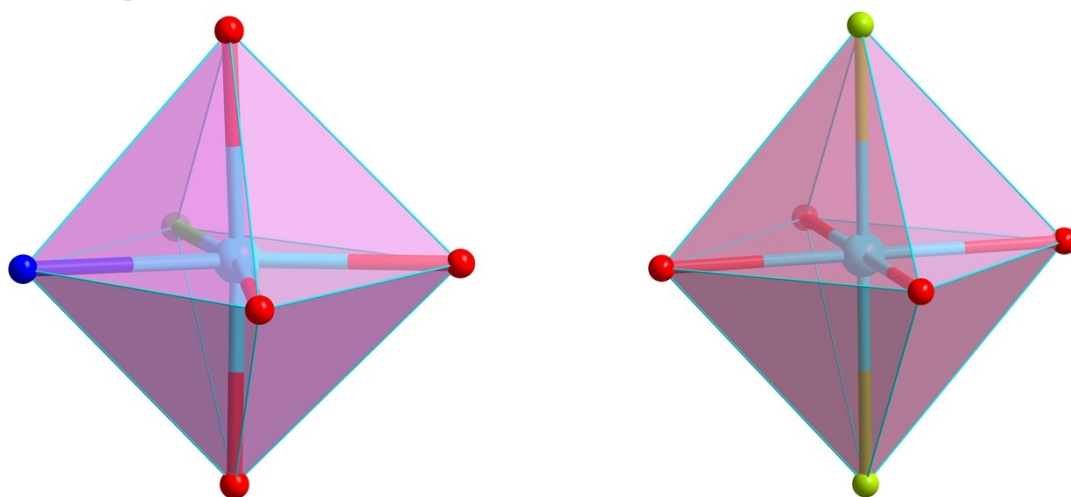

**Fig. S3** Coordination arrangement of  $Cd^{2+1}$  (a) and  $Cd^{2+2}$  (b) ions could be described as a distorted quadrilateral bipyramid and quadrilateral bipyramid coordination geometry respectively.

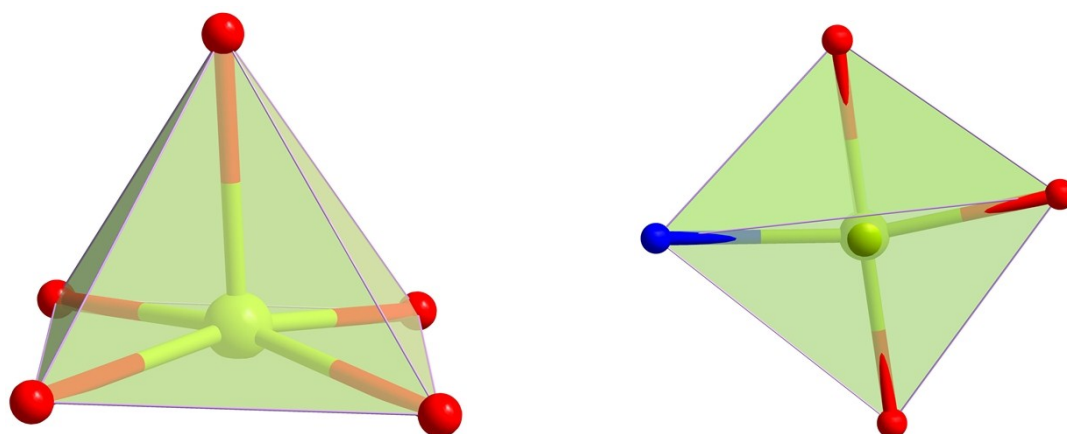

**Fig. S4** Coordination arrangement of  $Cu^{2+1}$  (a) and  $Cu^{2+2}$  (b) ions could be described as a distorted pentagonal pyramid and distorted quadrilateral coordination geometry respectively.

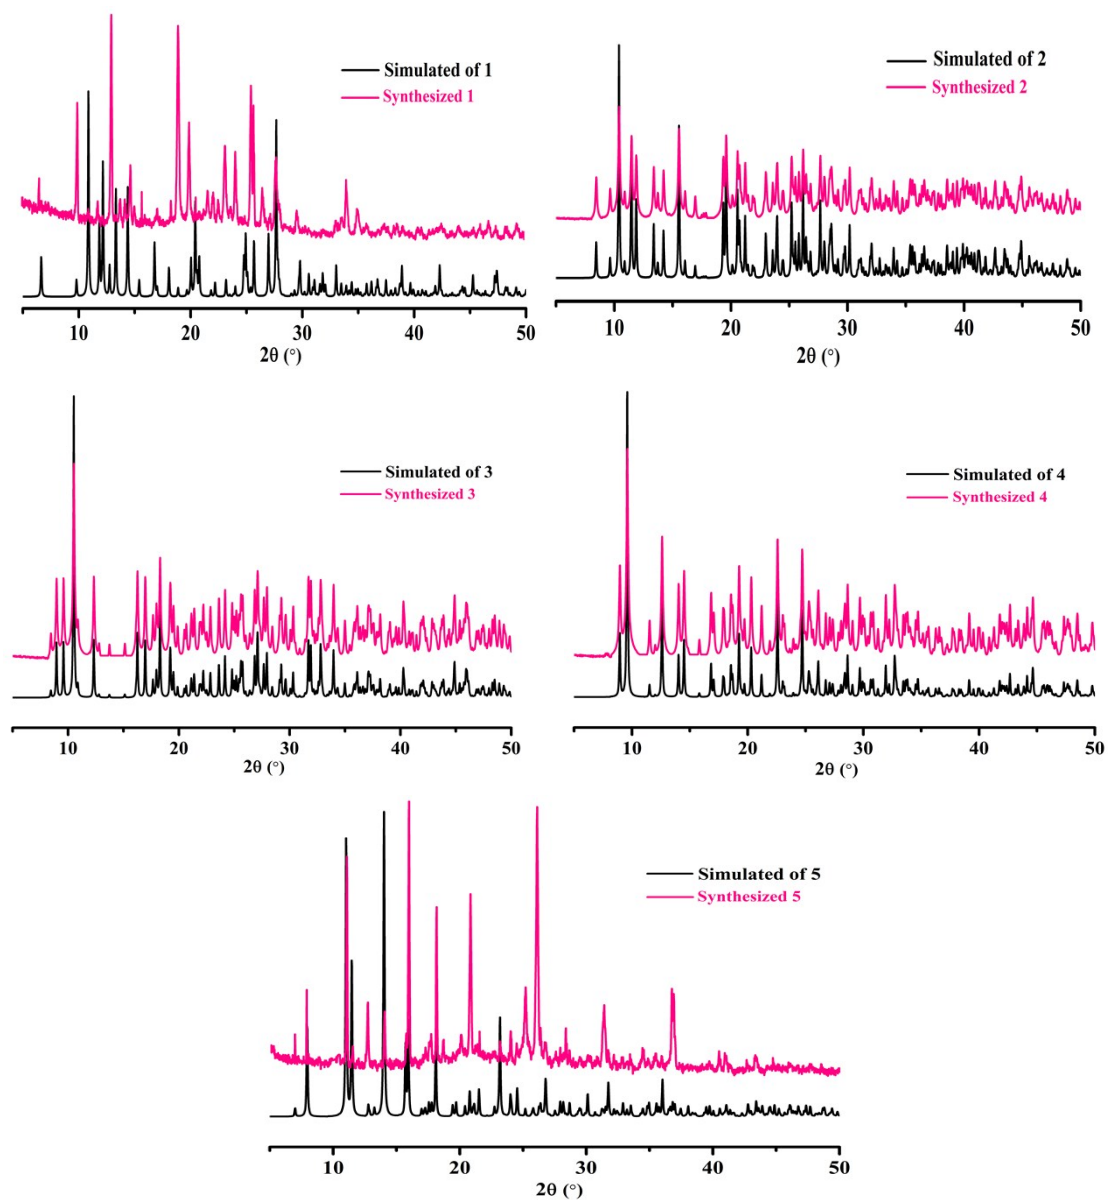

**Fig. S5** PXR D patterns of complex 1-5 simulated from the X-ray single-crystal data and as-synthesized products.

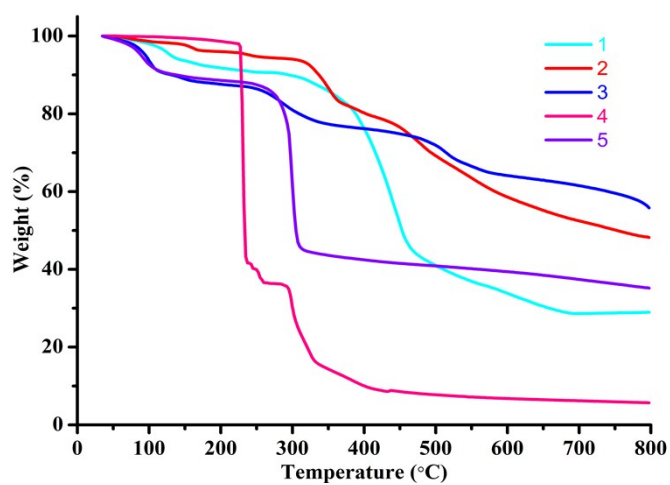

**Fig. S6** The TGA curve of complex 1-5.



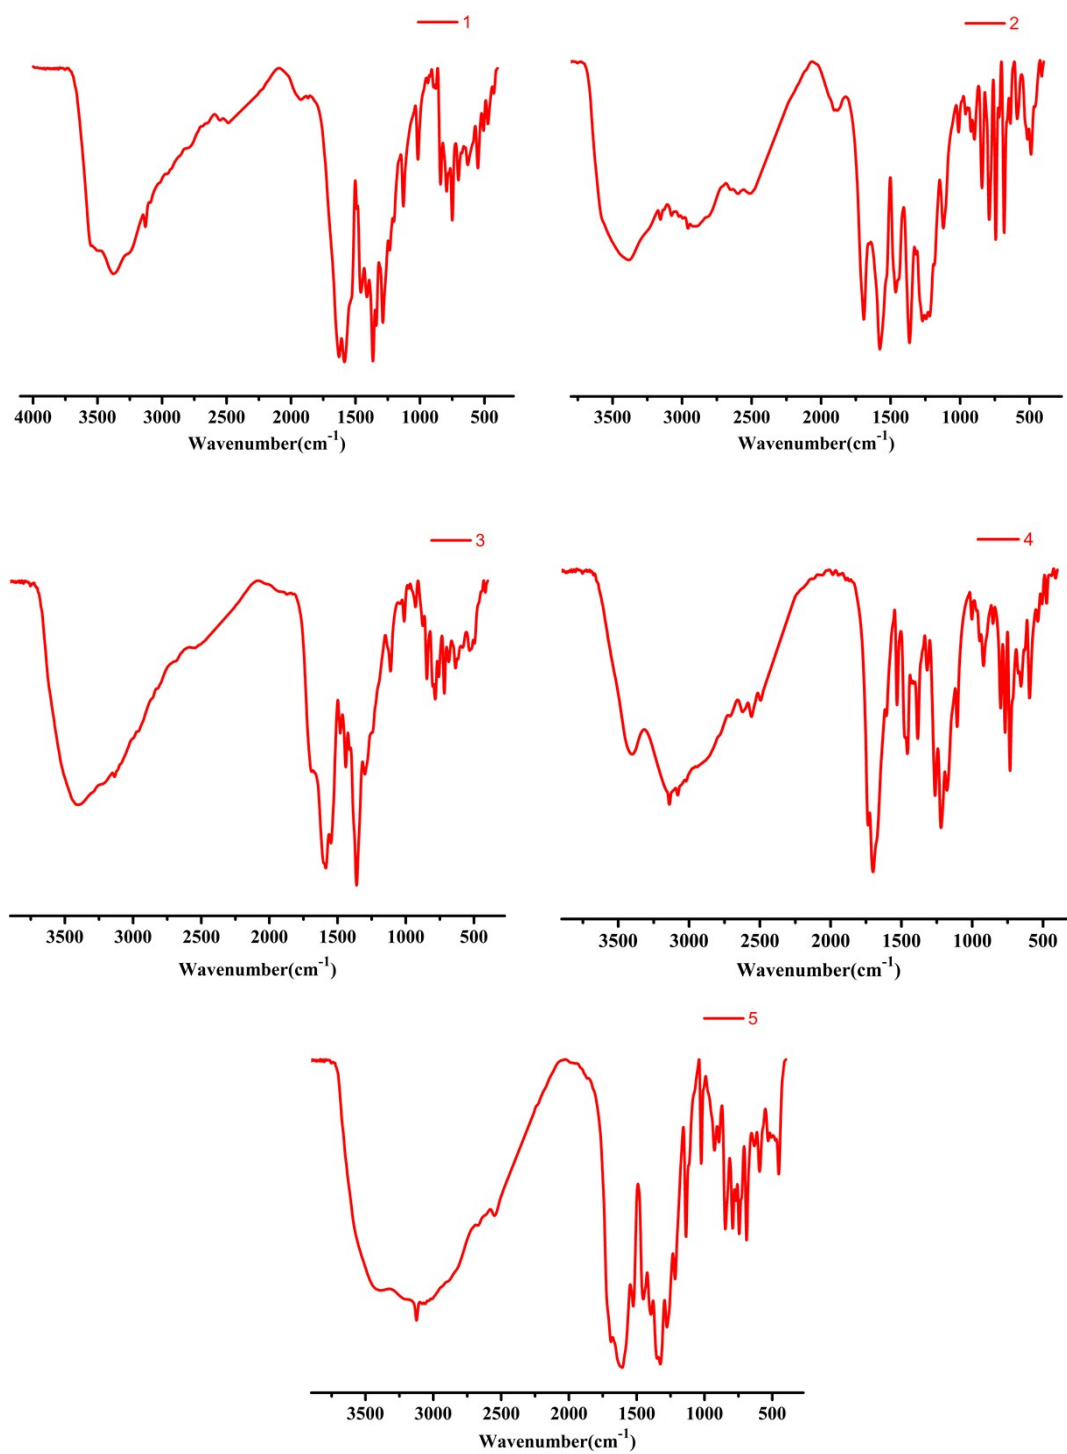

**Fig. S7** The FT-IR spectra of complex 1-5.

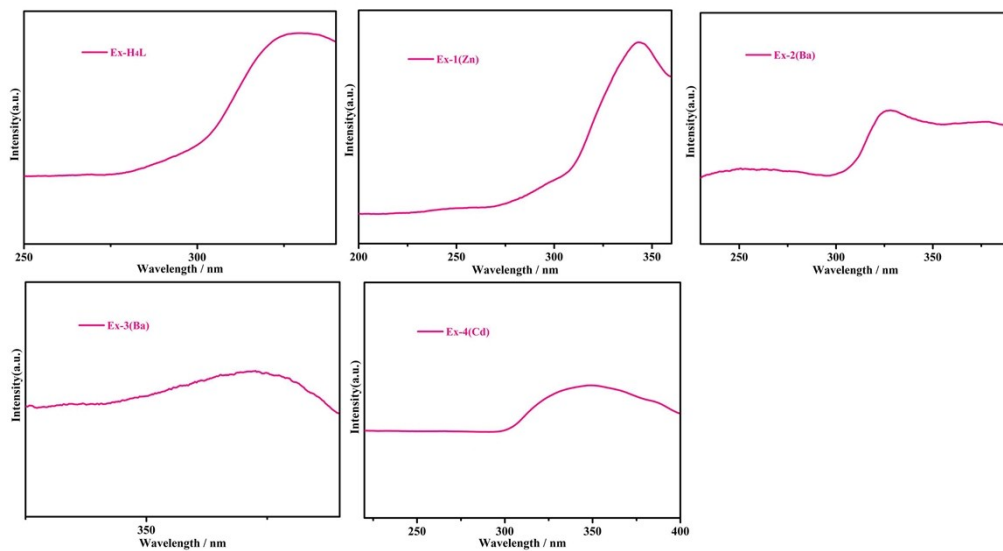

**Fig. S8** Solid-state excitation spectra of H<sub>4</sub>L ligands and MOFs 1–4.

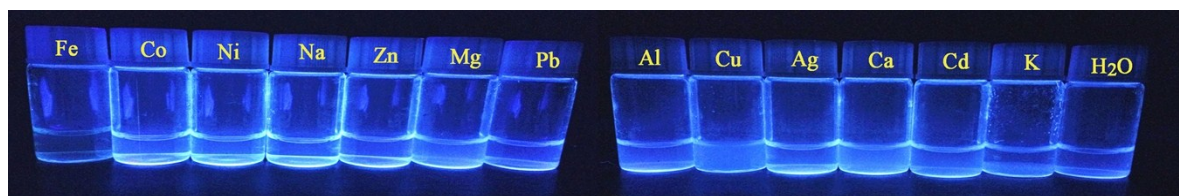

**Fig. S9** Pictures of different M<sup>n+</sup>@1(Zn) solutions.

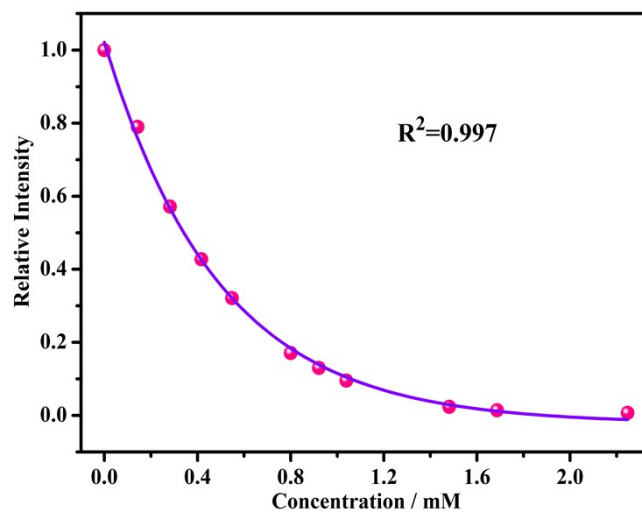

**Fig. S10** The linear correlation for the plot of  $I_0/I$  vs concentration of Fe<sup>3+</sup> ions in low concentration range.

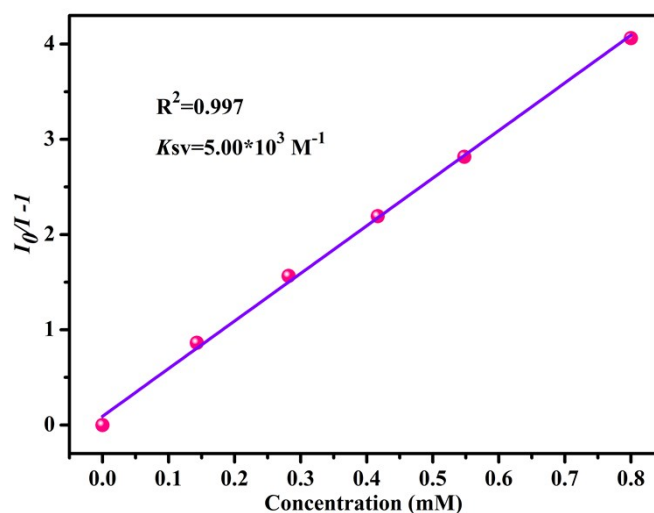

**Fig. S11** Quenching efficiency defined by the Stern–Volmer relationship for Fe<sup>3+</sup> ions.

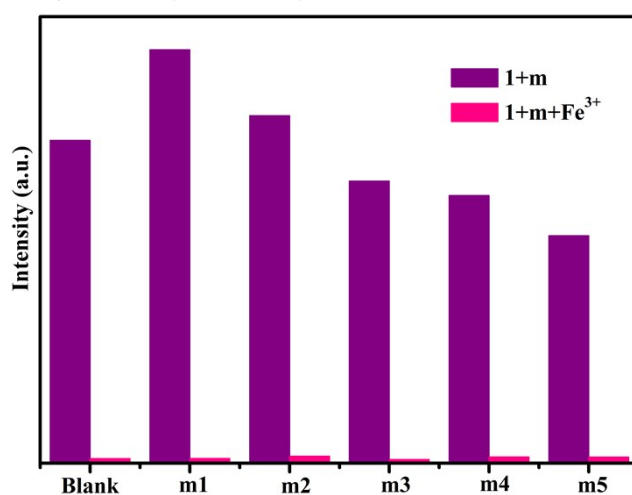

**Fig. S12** Luminescence intensity at 407 nm of 1(Zn) dispersed in water with addition of different mixed ions (10<sup>-2</sup> M) mixed solution added Fe<sup>3+</sup> ions (10<sup>-2</sup> M) (m1: K<sup>+</sup>/Cd<sup>2+</sup>; m2: Ca<sup>2+</sup>/Ag<sup>+</sup>/Cd<sup>2+</sup>; m3: Al<sup>3+</sup>/Pb<sup>2+</sup>/Cu<sup>2+</sup>; m4: Na<sup>+</sup>/Co<sup>2+</sup>/Zn<sup>2+</sup>; m5: Mg<sup>2+</sup>/Ni<sup>2+</sup>).

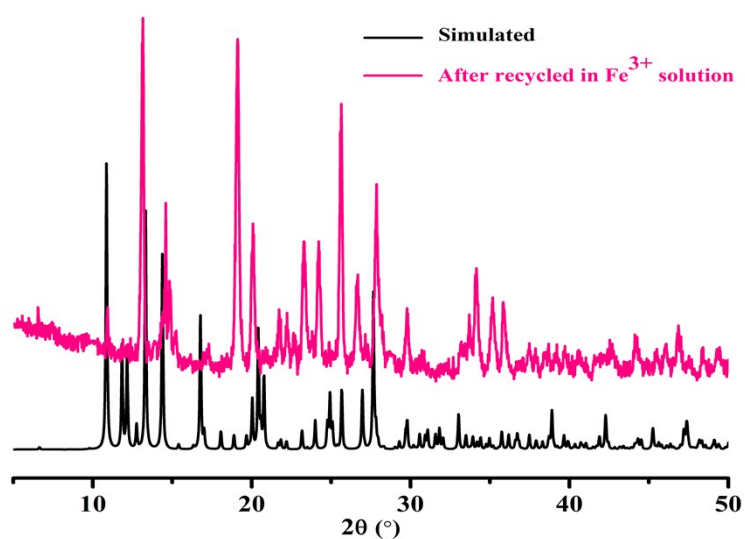

**Fig. S13** The PXRD patterns of 1(Zn) treated by Fe<sup>3+</sup> aqueous solutions.

| Sample                                                               | Concentration of Zn <sup>2+</sup> ( ug/mL) |
|----------------------------------------------------------------------|--------------------------------------------|
| Blank sample (H <sub>2</sub> O)                                      | 0.0206                                     |
| Initial solution after immersing in H <sub>2</sub> O                 | 0.0318                                     |
| Final solution after recycle sensing experiment for Fe <sup>3+</sup> | 0.0296                                     |

Fig. S14 ICP experiments of **1**(Zn) after immersing in different solution.

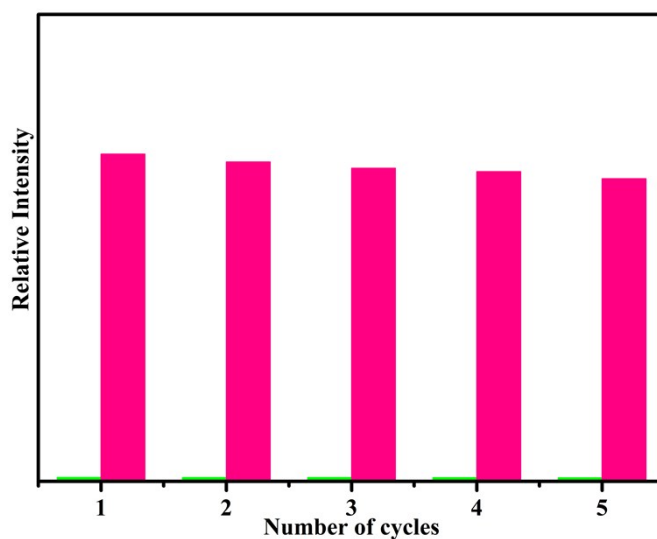

Fig. S15 Luminescent intensity at 407 nm of **1**(Zn) after five cycles in Fe<sup>3+</sup> solutions (10<sup>-2</sup> M).

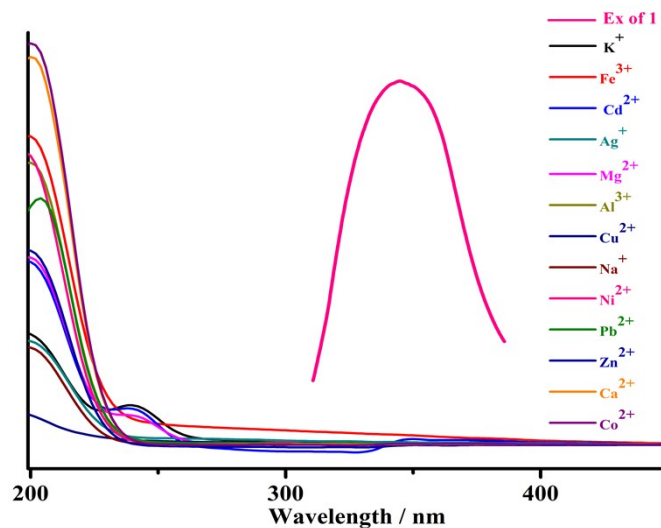

Fig. S16 UV-Vis adsorption spectrum of M(NO<sub>3</sub>)<sub>n</sub> aqueous solution and the excitation spectrum of **1**(Zn).
